# Supplementary material for: Experimental Study on the Reaction of Magnesium in Carbon Dioxide and Nitrogen Atmosphere
Source: MDPI journal article supplement (doi:10.3390/chemengineering8020041), 2024-04-06
Supplement: s1 [file s1]

# Experimental study on the reaction of Magnesium in Carbon Dioxide and Nitrogen atmosphere

Supplementary material

**Table S1.** Reaction enthalpy for magnesium combustion in carbon dioxide (reaction 1)

| Component           | $\Delta H_f^\circ$ , kJ/mol |
|---------------------|-----------------------------|
| Mg                  | 0                           |
| CO <sub>2</sub> (g) | -393.5                      |
| MgO (s)             | -601.8                      |
| C (s)               | 0                           |

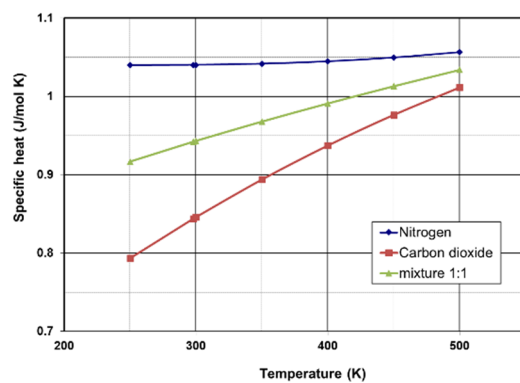

(a)

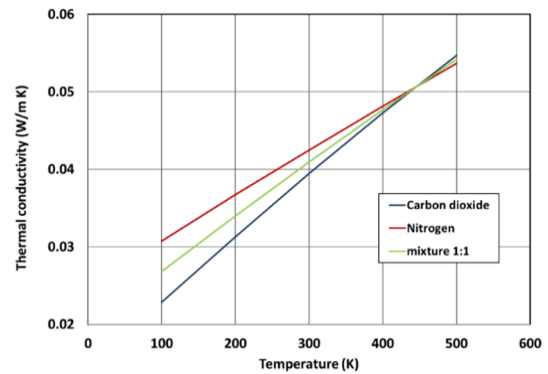

(b)

**Figure S1.** Specific heat (a) and thermal conductivity (b) of N<sub>2</sub>, CO<sub>2</sub> (1:1) mixture.

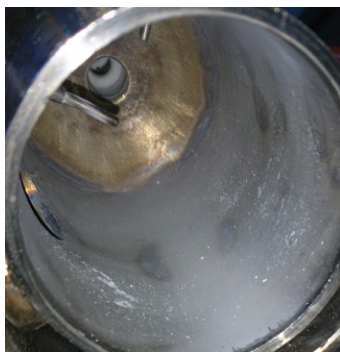

**Figure S2.** Combustion chamber after test.
